# Supplementary material for: Criteria prioritization for sustainable development of second-generation bioethanol in Thailand with an application of Delphi-AHP technique
Source: Research Square preprint supplement (doi:10.21203/rs.3.rs-135251/v1), 2020-12-28
Supplement: Supplementary file 1 [file c43e2ab28f2ea23099b76e2b.xlsx]

## Sheet: Sheet1
Table 6 Frequency of mentioned topics as additional criteria
Mentioned topics	Government	Industry / Business sectors	NPO / NGO	Academic/ Research Institute	Financial institution/ Bank	Total
Governmental subsidy	3	2	2	1	3	11
Technology readiness level	2	2	1	2	2	9
Co-products	3	1	1	2	1	8
Air pollution level	1	-	2	3	1	7
Water management and irrigation system	1	1	1	-	2	5
Material balance	-	1	-	2	1	4
Output wastes	1	1	1	-	1	4
Forest areas	1	-	1	-	1	3
Fertilizer and pesticides	-	1	1	-	-	2
Job quality	-	-	-	-	1	1
Land prices	-	-	-	-	-	0
